# Supplementary material for: Enantiospecific Pharmacogenomics of Fluvastatin
Source: PubMed Central journal article supplement — Clin Pharmacol Ther. 2019 May 14;106(3):668–80. doi: 10.1002/cpt.1463 (PMC6767327; doi:10.1002/cpt.1463), 2019-05-14
Supplement: CPT-106-668-s001.pdf [file CPT-106-668-s001.pdf]

**Table S1** Pharmacokinetic variables of 3R,5S- and 3S,5R-fluvastatin in 200 healthy volunteers.

| Variable                     | Geometric mean | CV  | Range   |
|------------------------------|----------------|-----|---------|
| 3R,5S-fluvastatin            |                |     |         |
| C <sub>max</sub> (ng/ml)     | 153            | 86% | 24-559  |
| T <sub>max</sub> (h)*        | 1.0            | -   | 0.5-5.0 |
| AUC <sub>0-∞</sub> (ng·h/ml) | 215            | 62% | 65-1026 |
| t <sub>1/2</sub> (h)         | 2.0            | 29% | 1.0-4.3 |
| 3S,5R-fluvastatin            |                |     |         |
| C <sub>max</sub> (ng/ml)     | 157            | 92% | 18-634  |
| T <sub>max</sub> (h)*        | 1.0            | -   | 0.5-5.0 |
| AUC <sub>0-∞</sub> (ng·h/ml) | 199            | 63% | 54-1031 |
| t <sub>1/2</sub> (h)         | 2.5            | 26% | 1.2-5.9 |

AUC<sub>0-∞</sub>, area under the plasma concentration-time curve from 0 h to infinity; CV, geometric coefficient of variation; C<sub>max</sub>, peak plasma concentration; T<sub>max</sub>, concentration peak time; t<sub>1/2</sub>, elimination half-life

\*T<sub>max</sub> data given as median
