# Supplementary material for: Enantiospecific Pharmacogenomics of Fluvastatin
Source: PubMed Central journal article supplement — Clin Pharmacol Ther. 2019 May 14;106(3):668–80. doi: 10.1002/cpt.1463 (PMC6767327; doi:10.1002/cpt.1463), 2019-05-14
Supplement: CPT-106-668-s002.pdf [file CPT-106-668-s002.pdf]

**Table S2** SNVs (MAF $\geq$ 0.01) included in the candidate gene analysis.\*

| dpSNP       | Gene           | Protein | Nucleotide change | Amino acid change | MAF   |
|-------------|----------------|---------|-------------------|-------------------|-------|
| rs17222561  | <i>ABCC2</i>   | MRP2    | c.1483A>G         | p.Lys495Glu       | 0.015 |
| rs17222723  | <i>ABCC2</i>   | MRP2    | c.3563T>A         | p.Val1188Glu      | 0.022 |
| rs8187710   | <i>ABCC2</i>   | MRP2    | c.4544G>A         | p.Cys1515Tyr      | 0.022 |
| rs17222617  | <i>ABCC2</i>   | MRP2    | c.2546T>G         | p.Leu849Arg       | 0.050 |
| rs2273697   | <i>ABCC2</i>   | MRP2    | c.1249G>A         | p.Val417Ile       | 0.172 |
| rs2231142   | <i>ABCG2</i>   | BCRP    | c.421C>A          | p.Gln141Lys       | 0.092 |
| rs2231137   | <i>ABCG2</i>   | BCRP    | c.34G>A           | p.Val12Met        | 0.129 |
| rs1048943   | <i>CYP1A1</i>  | CYP1A1  | c.1384A>G         | p.Ile462Val       | 0.052 |
| rs1058930   | <i>CYP2C8</i>  | CYP2C8  | c.792C>G          | p.Ile264Met       | 0.072 |
| rs11572080  | <i>CYP2C8</i>  | CYP2C8  | c.416G>A          | p.Arg139Lys       | 0.107 |
| rs10509681  | <i>CYP2C8</i>  | CYP2C8  | c.1196A>G         | p.Lys399Arg       | 0.109 |
| rs1057910   | <i>CYP2C9</i>  | CYP2C9  | c.1075A>C         | p.Ile359Leu       | 0.070 |
| rs1799853   | <i>CYP2C9</i>  | CYP2C9  | c.430C>T          | p.Arg144Cys       | 0.112 |
| rs35599367  | <i>CYP3A4</i>  | CYP3A4  | c.522-191C>T      | -                 | 0.035 |
| rs4149056   | <i>SLCO1B1</i> | OATP1B1 | c.521T>C          | p.Val174Ala       | 0.221 |
| rs2306283   | <i>SLCO1B1</i> | OATP1B1 | c.388A>G          | p.Asn130Asp       | 0.431 |
| rs11045819  | <i>SLCO1B1</i> | OATP1B1 | c.463C>A          | p.Pro155Thr       | 0.090 |
| rs34671512  | <i>SLCO1B1</i> | OATP1B1 | c.1929A>C         | p.Leu643Phe       | 0.047 |
| rs60140950  | <i>SLCO1B3</i> | OATP1B3 | c.767G>C          | p.Gly256Ala       | 0.104 |
| rs7311358   | <i>SLCO1B3</i> | OATP1B3 | c.699G>A          | p.Met233Ile       | 0.244 |
| rs4149117   | <i>SLCO1B3</i> | OATP1B3 | c.334T>G          | p.Ser112Ala       | 0.243 |
| rs78825186  | <i>SLCO2B1</i> | OATP2B1 | c.917G>A          | p.Arg306His       | 0.012 |
| rs12422149  | <i>SLCO2B1</i> | OATP2B1 | c.935G>A          | p.Arg312Gln       | 0.117 |
| rs35199625  | <i>SLCO2B1</i> | OATP2B1 | c.601G>A          | p.Val201Met       | 0.020 |
| rs2306168   | <i>SLCO2B1</i> | OATP2B1 | c.1457C>T         | p.Ser486Phe       | 0.041 |
| rs142693902 | <i>SLCO2B1</i> | OATP2B1 | c.332G>A          | p.Arg111Gln       | 0.011 |

dbSNP, National Center for Biotechnology Information Short Genetic Variations database;

MAF, minor allele frequency

\*CYP2D6 metabolizer status was included to the analysis as the activity score
