# Supplementary material for: Enantiospecific Pharmacogenomics of Fluvastatin
Source: PubMed Central journal article supplement — Clin Pharmacol Ther. 2019 May 14;106(3):668–80. doi: 10.1002/cpt.1463 (PMC6767327; doi:10.1002/cpt.1463), 2019-05-14
Supplement: CPT-106-668-s003.pdf [file CPT-106-668-s003.pdf]

**Table S3** Results of the candidate gene analysis with *SLCO1B1* haplotypes on 3R,5S- and 3S,5R-fluvastatin AUC<sub>0-∞</sub>, total fluvastatin AUC<sub>0-∞</sub>, and 3R,5S/3S,5R AUC<sub>0-∞</sub> ratio.

| Pharmacokinetic variable             | Covariate/SNV                        | Effect* |                |                          | Bonferroni adjusted <i>P</i> value | Adjusted R <sup>2</sup> for each step |
|--------------------------------------|--------------------------------------|---------|----------------|--------------------------|------------------------------------|---------------------------------------|
|                                      |                                      | Average | 90% CI         | <i>P</i> value           |                                    |                                       |
| 3R,5S-fluvastatin AUC <sub>0-∞</sub> | BSA                                  | -19.7%  | -23.2%, 16.0%  | 4.32 × 10 <sup>-14</sup> |                                    | 0.24                                  |
|                                      | <i>CYP2C9</i> *3 (rs1057910)         | 64.8%   | 43.8%, 88.9%   | 6.92 × 10 <sup>-9</sup>  | 2.01 × 10 <sup>-7</sup>            | 0.36                                  |
|                                      | <i>SLCO1B1</i> *15                   | 36.2%   | 24.6%, 49.1%   | 4.57 × 10 <sup>-8</sup>  | 1.33 × 10 <sup>-6</sup>            | 0.45                                  |
|                                      | <i>CYP2C9</i> *2 (rs17999853)        | 21.2%   | 8.8%, 35.0%    | 0.00360                  | 0.104                              | 0.47                                  |
| 3S,5R-fluvastatin AUC <sub>0-∞</sub> | BSA                                  | -20.7%  | -24.4%, -16.8% | 9.14 × 10 <sup>-14</sup> |                                    | 0.20                                  |
|                                      | <i>CYP2C9</i> *3 (rs1057910)         | 93.6%   | 67.2%, 124.2%  | 2.80 × 10 <sup>-12</sup> | 7.85 × 10 <sup>-11</sup>           | 0.35                                  |
|                                      | <i>CYP2C9</i> *2 (rs17999853)        | 29.1%   | 14.9%, 45.0%   | 3.81 × 10 <sup>-4</sup>  | 0.0107                             | 0.38                                  |
|                                      | <i>SLCO2B1</i> c.601G>A (rs35199625) | 45.2%   | 10.7%, 90.6%   | 0.0242                   | 0.679                              | 0.39                                  |
|                                      | <i>SLCO2B1</i> c.1457C>T (rs2306168) | -21.7%  | -34.9%, -5.8%  | 0.0301                   | 0.844                              | 0.40                                  |
| Total AUC <sub>0-∞</sub>             | BSA                                  | -19.6%  | -23.2%, -15.8% | 2.00 × 10 <sup>-13</sup> |                                    | 0.23                                  |
|                                      | <i>CYP2C9</i> *3 (rs1057910)         | 73.8%   | 51.1%, 99.8%   | 5.27 × 10 <sup>-10</sup> | 1.53 × 10 <sup>-8</sup>            | 0.37                                  |
|                                      | <i>SLCO1B1</i> *15                   | 23.0%   | 12.2%, 34.9%   | 2.59 × 10 <sup>-4</sup>  | 0.00750                            | 0.40                                  |
|                                      | <i>CYP2C9</i> *2 (rs17999853)        | 24.4%   | 11.5%, 39.0%   | 0.00124                  | 0.0359                             | 0.43                                  |
| 3R,5S/3S,5R AUC <sub>0-∞</sub> ratio | <i>SLCO1B1</i> *15                   | 25.0%   | 21.2%, 28.9%   | 3.30 × 10 <sup>-25</sup> | 9.58 × 10 <sup>-24</sup>           | 0.33                                  |
|                                      | <i>SLCO1B1</i> *35                   | -15.7%  | -20.4%, -10.8% | 1.85 × 10 <sup>-6</sup>  | 5.36 × 10 <sup>-5</sup>            | 0.39                                  |
|                                      | <i>SLCO1B1</i> *5                    | 26.6%   | 17.7%, 36.1%   | 2.44 × 10 <sup>-7</sup>  | 7.07 × 10 <sup>-6</sup>            | 0.45                                  |
|                                      | <i>SLCO1B1</i> *14                   | -10.0%  | -13.9%, -5.9%  | 1.08 × 10 <sup>-4</sup>  | 0.00313                            | 0.50                                  |
|                                      | <i>CYP2C9</i> *3 (rs1057910)         | -11.1%  | -15.1%, -6.9%  | 3.72 × 10 <sup>-5</sup>  | 0.00108                            | 0.53                                  |
|                                      | <i>SLCO2B1</i> c.935G>A (rs12422149) | -5.4%   | -8.9%, -1.7%   | 0.0178                   | 0.516                              | 0.54                                  |
|                                      | <i>SLCO2B1</i> c.1457C>T (rs2306168) | 7.9%    | 1.9%, 14.2%    | 0.0289                   | 0.837                              | 0.55                                  |

BSA, body surface area; AUC<sub>0-∞</sub>, area under the plasma concentration-time curve from 0 h to infinity

CI, confidence interval; SNV, single nucleotide variation

\*Per 10% increase in BSA or variant allele copy
